# Supplementary material
Source: publisher site journal article supplement (https://www.dovepress.com/get_supplementary_file.php?f=333858.docx)
Supplement: Supplementary file 1 [file get_supplementary_file.php]

**Supplementary Table S1.** Characteristics of female patients with breast cancer and changes in trends between 2005 and 2018

| **Characteristic** | **Year** | | | | | | | | | | ***p*-value** | **Total**  **(n=3,712)** | |
| --- | --- | --- | --- | --- | --- | --- | --- | --- | --- | --- | --- | --- | --- |
| **2005–2009**  **(n=716)** | | **2010–2012**  **(n = 706)** | | **2013–2014**  **(n=721)** | | **2015–2016**  **(n=768)** | | **2017–2018**  **(n=801)** | |
| T stage, n (%) |  | | | | | | | | | | 0.015a |  |  |
| Tis | 15 | (2.1) | 12 | (1.7) | 11 | (1.5) | 11 | (1.4) | 8 | (1.0) |  | 57 | (1.5) |
| T1 | 110 | (15.4) | 161 | (22.8) | 216 | (30.0) | 207 | (27.0) | 269 | (33.6) |  | 963 | (26.0) |
| T2 | 491 | (68.6) | 447 | (63.3) | 398 | (55.2) | 415 | (54.0) | 414 | (51.7) |  | 2,165 | (58.3) |
| T3 | 69 | (9.6) | 67 | (9.5) | 59 | (8.2) | 72 | (9.4) | 62 | (7.7) |  | 329 | (8.9) |
| T4 | 31 | (4.3) | 19 | (2.7) | 37 | (5.1) | 63 | (8.2) | 48 | (6.0) |  | 198 | (5.3) |
| N stage, n (%) | | | | | | | | | | | 0.339a |  |  |
| N0 | 325 | (45.4) | 353 | (50.0) | 350 | (48.6) | 359 | (46.7) | 361 | (45.1) |  | 1,748 | (47.1) |
| N1 | 203 | (28.4) | 156 | (22.1) | 173 | (24.0) | 195 | (25.4) | 234 | (29.2) |  | 961 | (25.9) |
| N2 | 107 | (14.9) | 111 | (15.7) | 107 | (14.8) | 103 | (13.4) | 89 | (11.1) |  | 517 | (13.9) |
| N3 | 81 | (11.3) | 86 | (12.2) | 91 | (12.6) | 111 | (14.5) | 117 | (14.6) |  | 486 | (13.1) |
| Breast surgery, n (%) | | | | | | | | | | | 0.002a |  |  |
| None | 28 | (3.9) | 11 | (1.6) | 55 | (7.6) | 102 | (13.3) | 99 | (12.3) |  | 295 | (7.9) |
| Mastectomy | 675 | (94.3) | 676 | (95.7) | 630 | (87.4) | 592 | (77.1) | 588 | (73.4) |  | 3,161 | (85.2) |
| BCS | 13 | (1.8) | 19 | (2.7) | 32 | (4.4) | 65 | (8.4) | 71 | (8.9) |  | 200 | (5.4) |
| Mastectomy + reconstruction | 0 | (0.0) | 0 | (0.0) | 4 | (0.6) | 9 | (1.2) | 43 | (5.4) |  | 56 | (1.5) |
| Axillary surgery, n (%) | | | | | | | | | | | <0.001a |  |  |
| None | 34 | (4.8) | 13 | (1.8) | 58 | (8.0) | 105 | (13.7) | 101 | (12.6) |  | 311 | (8.4) |
| ALND | 681 | (95.1) | 681 | (96.5) | 488 | (67.7) | 460 | (59.9) | 245 | (30.6) |  | 2,555 | (68.8) |
| SLNB | 0 | (0.0) | 2 | (0.3) | 116 | (16.1) | 143 | (18.6) | 291 | (36.3) |  | 552 | (14.9) |
| SLNB + ALND | 1 | (0.1) | 10 | (1.4) | 59 | (8.2) | 60 | (7.8) | 164 | (20.5) |  | 294 | (7.9) |
| Neoadjuvant therapy, n (%) | | | | | | | | | | | <0.001a |  |  |
| No | 678 | (94.7) | 678 | (96.0) | 677 | (93.9) | 687 | (89.5) | 691 | (86.3) |  | 3,411 | (91.9) |
| Yes | 38 | (5.3) | 28 | (4.0) | 44 | (6.1) | 81 | (10.5) | 110 | (13.7) |  | 301 | (8.1) |
| Trastuzumab treatment, n (%) | | | | | | | | | | | <0.001a |  |  |
| No | 708 | (98.9) | 690 | (97.7) | 705 | (97.8) | 746 | (97.1) | 629 | (78.5) |  | 3,478 | (93.7) |
| Yes | 8 | (1.1) | 16 | (2.3) | 16 | (2.2) | 22 | (2.9) | 172 | (21.5) |  | 234 | (6.3) |
| Adjuvant radiotherapy, n (%) | | | | | | | | | | | <0.001a |  |  |
| No | 608 | (84.9) | 559 | (79.2) | 542 | (75.2) | 609 | (79.3) | 551 | (68.8) |  | 2,869 | (77.3) |
| Yes | 108 | (15.1) | 147 | (20.8) | 179 | (24.8) | 159 | (20.7) | 250 | (31.2) |  | 843 | (22.7) |
| Chemotherapy, n (%) | | | | | | | | | | | 0.083a |  |  |
| No | 213 | (29.7) | 155 | (22.0) | 178 | (24.7) | 243 | (31.6) | 166 | (20.7) |  | 955 | (25.7) |
| Yes | 503 | (70.3) | 551 | (78.0) | 543 | (75.3) | 525 | (68.4) | 635 | (79.3) |  | 2,757 | (74.3) |
| Endocrine therapy, n (%) | | | | | | | | | | | <0.001a |  |  |
| No | 474 | (66.2) | 394 | (55.8) | 316 | (43.8) | 301 | (39.2) | 382 | (47.7) |  | 1,867 | (50.3) |
| Yes | 242 | (33.8) | 312 | (44.2) | 405 | (56.2) | 467 | (60.8) | 419 | (52.3) |  | 1,845 | (49.7) |

a Linear-by-linear association

Abbreviations: ALND, axillary lymph node dissection; BCS, breast-conserving surgery; SLNB, sentinel lymph node biopsy.
